# Supplementary material
Source: PubMed Central journal article supplement (PMC1593159)

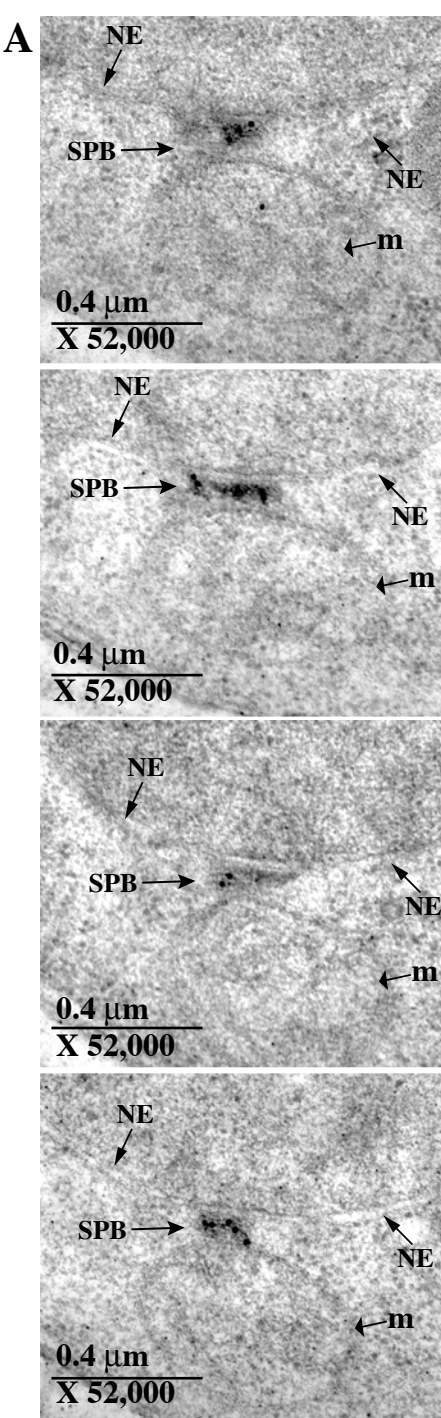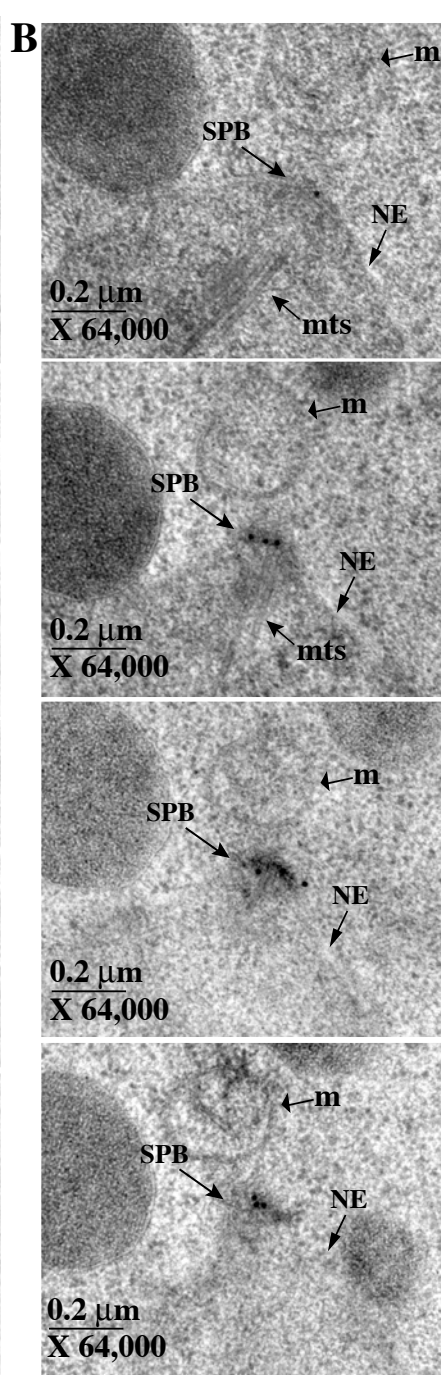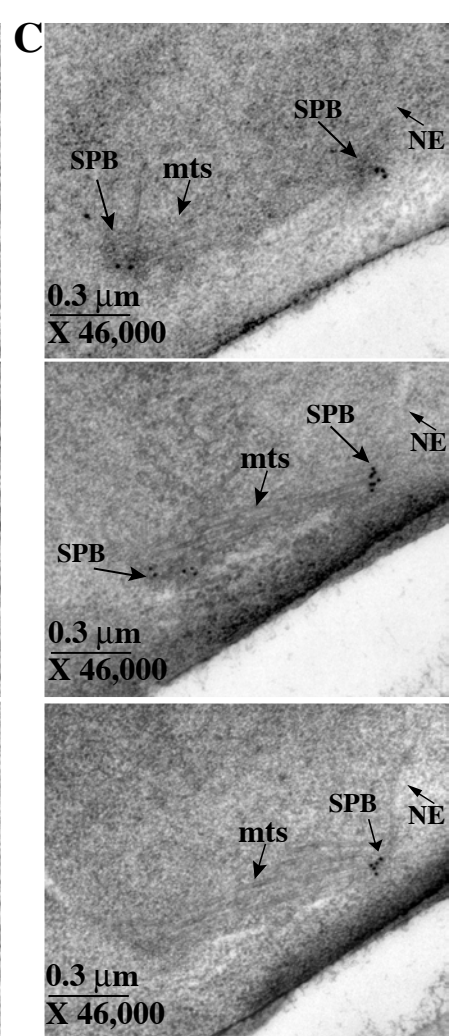

Supplement: mbc_E06-01-0039_1.pdf [file mbc_E06-01-0039_1.pdf]
